# Supplementary material
Source: MDPI journal article supplement (https://www.mdpi.com/2514-183X/6/3/23)
Supplement: s1 [file s1]

**Supplementary Table S1: Diagnoses and Procedure Codes**

| Diagnosis                              | ICD 10 – GM – 2020  |
|----------------------------------------|---------------------|
| <b>Ischaemic stroke</b>                | I63.-, I64.-        |
| <b>Chronic Kidney Disease*</b>         | N18                 |
| <b>Diabetes Mellitus</b>               | E10-E11             |
| <b>Obesity</b>                         | E66.-               |
| <b>Dyslipidaemia</b>                   | E78.-               |
| <b>Current Smoking Use</b>             | F17                 |
| <b>Hypertensive Disease</b>            | I10-I15             |
| <b>Atrial Fibrillation</b>             | I48.-               |
| <b>Acute Myocardial Infarction</b>     | I21.-, I22.-        |
| <b>Coronary Heart Disease</b>          | I25.1               |
| <b>Congestive Heart Failure</b>        | I50.-               |
| <b>Left ventricular Failure</b>        | I50.1 et seqq.      |
| <b>Right Ventricular Failure</b>       | I50.0               |
| <b>Peripheral Artery Disease</b>       | I70.20 - I70.25     |
| <b>Dementia</b>                        | F00.-, F01.--       |
| <b>Cancer</b>                          | C                   |
| <b>Previous Ischaemic stroke</b>       | I69.3, I69.4        |
| <b>Previous Intracranial bleeding</b>  | I69.0, I69.1, I69.2 |
| <b>Previous Valve</b>                  | Z95.2               |
| <b>Previous CABG</b>                   | Z95.1               |
| * GFR <60ml/min/1.73m <sup>2</sup> BSA |                     |

Acute stroke as principal diagnosis and co-morbidities as secondary diagnoses were coded according to the German Modification of the International Statistical Classification of Diseases and Related Health Problems 10th Revision (ICD-10-GM). Procedures were coded according to the German Procedure Classification (OPS).

CABG denotes coronary artery bypass graft surgery; GFR glomerular filtration rate; BSA body surface area.

**Supplementary Table S2: Definitions of complications and procedures according to ICD-10-GM and OPS codes**

| <b>Complication</b>                       | <b>Parameter / ICD-10-GM code / OPS code</b>                                                                                                                   |
|-------------------------------------------|----------------------------------------------------------------------------------------------------------------------------------------------------------------|
| <b>In-Hospital Death</b>                  | 7                                                                                                                                                              |
| <b>Sepsis, unspecified</b>                | A41                                                                                                                                                            |
| <b>Transfusion</b>                        | 8-800.c                                                                                                                                                        |
| <b>Bleeding event</b>                     | H44.8, K92, T81.0-3, K81.7                                                                                                                                     |
| <b>Haemorrhagic transformation</b>        | I60 – I62                                                                                                                                                      |
| <b>Acute kidney injury</b>                | N17.-                                                                                                                                                          |
| <b>Renal replacement therapy</b>          | 8-853, 8-854, 8-855                                                                                                                                            |
| <b>GpIIb/IIIa inhibitor</b>               | 6-002.j, 6-002.k, 6-002.m, 6-002.n                                                                                                                             |
| <b>Resuscitation</b>                      | 8-771                                                                                                                                                          |
| <b>Coronary artery bypass graft</b>       | 5-36 et seqq.                                                                                                                                                  |
| <b>Percutaneous coronary intervention</b> | 8-837 et seqq.                                                                                                                                                 |
| <b>Systemic thrombolysis</b>              | 8-020.8                                                                                                                                                        |
| <b>Selective thrombolysis</b>             | 8-836.70, 8-836.71                                                                                                                                             |
| <b>Intracerebral thrombolysis</b>         | 8-020.d                                                                                                                                                        |
| <b>Carotid endarterectomy</b>             | 5-380.0, 5-380.1                                                                                                                                               |
| <b>Carotid stenting</b>                   | 8-840.0h, 8-840.0j, 8-840.0k, 8-840.0m, 8-840.1h, 8-840.1j, 8-840.1k, 8-840.1m, 8-840.2h, 8-840.2j, 8-840.2k, 8-840.2m, 8-840.3h, 8-840.3j, 8-840.3k, 8-840.3m |
| <b>Carotid interponat</b>                 | 5-383.0                                                                                                                                                        |
| <b>Craniectomy</b>                        | 5-010-10, 5-010-11, 5-010-12, 5-010-13, 5-010-14                                                                                                               |
| <b>Drainage of extracerebral hematoma</b> | 5-013.1                                                                                                                                                        |

|                                                                                       |                    |
|---------------------------------------------------------------------------------------|--------------------|
| <b>Drainage of intracerebral hematoma</b>                                             | 5-014.1            |
| <b>Intra- and/or extracranial thromebectomy</b>                                       | 8-836.80, 8-836.81 |
| A code marked by a dash (-) indicates that all subheadings of this code are included. |                    |

Definitions of complications and procedures were coded according to the German Modification of the International Statistical Classification of Diseases and Related Health Problems 10th Revision (ICD-10-GM). Procedures were coded according to the German Procedure Classification (OPS).

**Supplementary Table S3: Results of logistic regression without interaction**

| <b>Variable</b>                        | <b>Odds ratio</b>   | <b>95% Confidence interval</b> | <b>P value</b> |
|----------------------------------------|---------------------|--------------------------------|----------------|
| <b>Age per year</b>                    | 1.05                | 1.05 – 1.05                    | <0.001         |
| <b>Female sex</b>                      | 1.12                | 1.11 – 1.14                    | <0.001         |
| <b>Hypertension</b>                    | 0.52                | 0.51 – 0.53                    | <0.001         |
| <b>Dyslipidemia</b>                    | 0.36                | 0.35 – 0.36                    | <0.001         |
| <b>Diabetes mellitus</b>               | 1.09                | 1.08 – 1.11                    | <0.001         |
| <b>Obesity</b>                         | 0.82                | 0.79 – 0.85                    | <0.001         |
| <b>Dementia</b>                        | 0.80                | 0.78 – 0.82                    | <0.001         |
| <b>Current smoking</b>                 | 0.64                | 0.60 – 0.67                    | <0.001         |
| <b>Prev. isch. stroke</b>              | 1.30                | 1.27 – 1.33                    | <0.001         |
| <b>Atrial fibrillation and flutter</b> | 1.35                | 1.34 – 1.37                    | <0.001         |
| <b>LEAD (RF stage 1 – 3)</b>           | 1.05                | 1.00 – 1.10                    | 0.034          |
| <b>CLTI (RF stage 4 – 6)</b>           | 1.77                | 1.68 – 1.87                    | <0.001         |
| <b>CVD</b>                             | 0.90                | 0.88 – 0.91                    | <0.001         |
| <b>CHF</b>                             | 1.81                | 1.78 – 1.84                    | <0.001         |
| <b>CKD</b>                             | 1.07                | 1.06 – 1.09                    | <0.001         |
| <b>Cancer</b>                          | 2.32                | 2.25 – 2.39                    | <0.001         |
| <b>Intercept</b>                       | $\beta_0 = -6.1160$ | -6.17 – -6.06                  | <0.001         |

Results of logistic regression without interaction.

LEAD denotes lower extremity arterial disease; CLTI chronic limb threatening ischemia; CVD cardiovascular disease; CHF ventricular chronic heart failure; CKD chronic kidney disease; SE standard error.

**Supplementary Table S4: Results of logistic regression with interaction between sex and all covariables.**

| Effect                          | Single effect                    |        |         | Interaction term with sex |        |         |
|---------------------------------|----------------------------------|--------|---------|---------------------------|--------|---------|
|                                 | B                                | SE     | p-value | $\beta$                   | SE     | p-value |
| Age per year                    | 0.0475                           | 0.0005 | <0.001  | 0.00593                   | 0.0007 | <0.001  |
| Female sex                      | -0.1055                          | 0.0569 | 0.064   | ***                       | ***    | ***     |
| Hypertension                    | -0.5692                          | 0.0109 | <0.001  | <.0001                    | 0.0145 | <0.001  |
| Dyslipidemia                    | -0.9481                          | 0.0124 | <0.001  | <.0001                    | 0.0170 | <0.001  |
| Diabetes mellitus               | 0.1021                           | 0.0111 | <0.001  | 0,1677                    | 0.0150 | 0.168   |
| Obesity                         | -0.1739                          | 0.0286 | <0.001  | 0,2576                    | 0.0380 | 0.258   |
| Dementia                        | -0.0906                          | 0.0215 | <0.001  | <.0001                    | 0.0273 | <0.001  |
| Current smoking                 | -0.5046                          | 0.0351 | <0.001  | 0,0238                    | 0.0591 | 0.024   |
| Prev. Ish. Stroke               | 0.2772                           | 0.0169 | <0.001  | 0,1115                    | 0.0235 | 0.112   |
| Atrial fibrillation and flutter | 0.3196                           | 0.0107 | <0.001  | 0,0401                    | 0.0141 | 0.040   |
| CLTI (RF stage 4 – 6)           | 0.0550                           | 0.0317 | 0.083   | 0,4850                    | 0.0491 | 0.485   |
| LEAD (RF stage 1 – 3)           | 0.5685                           | 0.0364 | <0.001  | 0,7753                    | 0.0534 | 0.775   |
| CVD                             | -0.1414                          | 0.0148 | <0.001  | 0,0043                    | 0.0207 | 0.004   |
| CHF                             | 0.7398                           | 0.0131 | <0.001  | <.0001                    | 0.0173 | <0.001  |
| CKD                             | 0.1593                           | 0.0132 | <0.001  | <.0001                    | 0.0175 | <0.001  |
| Cancer                          | 0.9260                           | 0.0194 | <0.001  | <.0001                    | 0.0291 | <0.001  |
| Intercept                       | $\beta_0 = -5.9895$ , SE= 0.0404 |        |         |                           |        | <0.001  |

CLTI denotes chronic limb threatening ischemia; LEAD lower extremity arterial disease; CVD cardiovascular disease; CHF ventricular chronic heart failure; CKD chronic kidney disease; SE standard error.
